# Supplementary material for: Structure-Guided Engineering of a Complement Component C3-Binding Nanobody Improves Specificity and Adds Cofactor Activity
Source: PubMed Central journal article supplement (PMC9352930; doi:10.3389/fimmu.2022.872536), 2022-07-22
Supplement: Image_1.pdf [file Image_1.pdf]

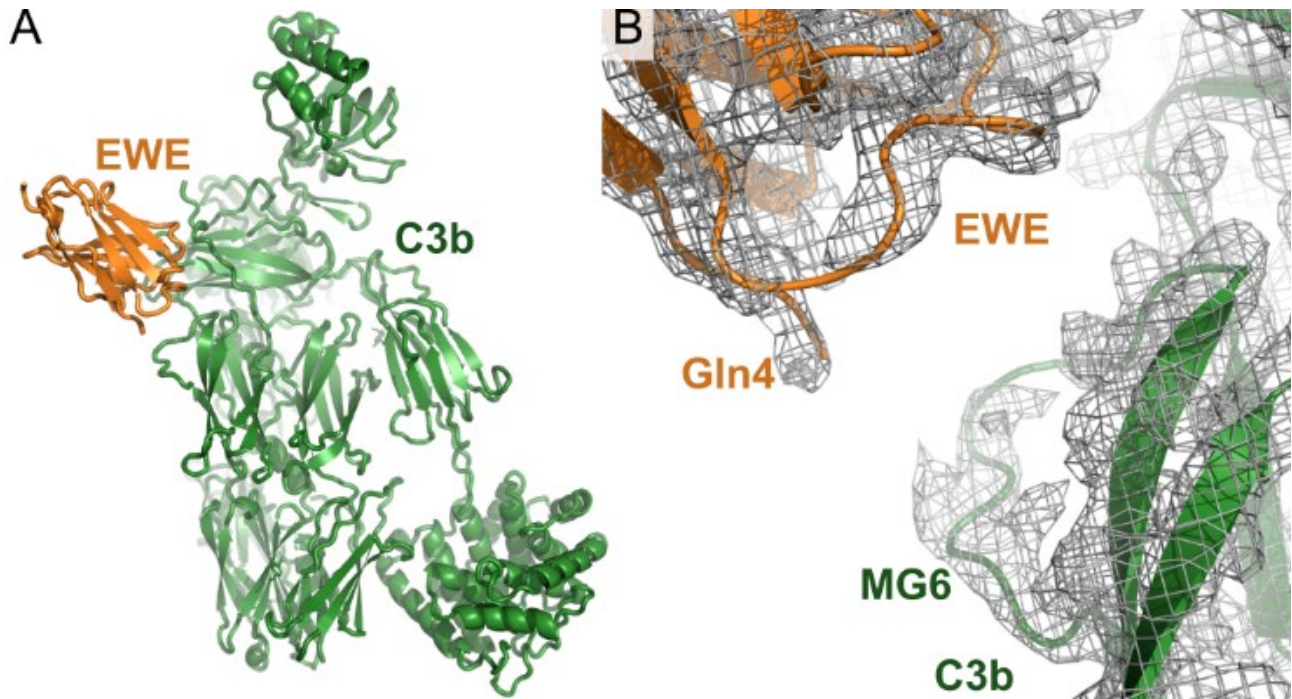

**Figure S1 Crystal structure of the EWE:C3b.** (A) Cartoon representation of the overall structure of EWE (orange) in complex with C3b (green). (B) Zoom on the N-terminus of EWE displaying the 2mF<sub>o</sub>-DF<sub>c</sub> map contoured at 1  $\sigma$ . Labels indicate the positions of glutamine 4 in EWE and the MG6 domain of C3b.
