# Supplementary material for: Structure-Guided Engineering of a Complement Component C3-Binding Nanobody Improves Specificity and Adds Cofactor Activity
Source: PubMed Central journal article supplement (PMC9352930; doi:10.3389/fimmu.2022.872536), 2022-07-22
Supplement: Table_1.pdf [file Table_1.pdf]

Engineering of a C3-specific nanobody

**Table S1 Sequence of EWE, EWE<sub>n</sub>H and EWE<sub>μ</sub>H.** TEV site is highlighted in green. Linkers joining EWE and CCP2 are highlighted in grey. Linker joining CCP4 and CCP19 is highlighted in yellow.

| Name               | Sequence                                                                                                                                                                                                                                                                                                                                                                                                                                                                                                                   |
|--------------------|----------------------------------------------------------------------------------------------------------------------------------------------------------------------------------------------------------------------------------------------------------------------------------------------------------------------------------------------------------------------------------------------------------------------------------------------------------------------------------------------------------------------------|
| EWE                | MEWEQVQLVETGGGLVQAGGSLRLSCAASGSIFSINAMGWFRQAPGKEREVATINR<br>SGGRITYYADSVKGRFTISRDNKGKMNMYLQMHSCLKPEDTAIYYCAAGTGWSPQTDNE<br>YNYWGQGTQVTVSSHHHHHH                                                                                                                                                                                                                                                                                                                                                                            |
| EWE <sub>n</sub> H | EWEQVQLVETGGGLVQAGGSLRLSCAASGSIFSINAMGWFRQAPGKEREVATINRSG<br>GRITYYADSVKGRFTISRDNKGKMNMYLQMHSCLKPEDTAIYYCAAGTGWSPQTDNEYN<br>YWGQGTQVTVSSGGGGSGGGSGGGSGGGSRPCGHPGDTPFGTFTLTGGNVFEY<br>GVKAVYTCNEGYQLLGEINYRECDTDGWTNDIPICEVVKCLPVTAPENKIVSSAMEP<br>DREYHFGQAVRFVCNSGYKIEGDEEMHCSDDGFWSKEKPKCVEISCKSPDVINGSPISQ<br>KIIYKENERFQYKCNMGYEYSERGDVCTESGWRPLPSCEEAHHHHHH                                                                                                                                                           |
| EWE <sub>μ</sub> H | EWEQVQLVETGGGLVQAGGSLRLSCAASGSIFSINAMGWFRQAPGKEREVATINRSG<br>GRITYYADSVKGRFTISRDNKGKMNMYLQMHSCLKPEDTAIYYCAAGTGWSPQTDNEYN<br>YWGQGTQVTVSSGGGGSGGGSGGGSGGGSRPCGHPGDTPFGTFTLTGGNVFEY<br>GVKAVYTCNEGYQLLGEINYRECDTDGWTNDIPICEVVKCLPVTAPENKIVSSAMEP<br>DREYHFGQAVRFVCNSGYKIEGDEEMHCSDDGFWSKEKPKCVEISCKSPDVINGSPISQ<br>KIIYKENERFQYKCNMGYEYSERGDVCTESGWRPLPSCEEAGGGGGGGGGGGGK<br>CGPPPIDNGDITSFPLSVYAPASSVEYQCQONLYQLEGNKRITCRNGQWSEPPKCLHPC<br>VISREIMENYNIALRWTAQKQLYSRTGESVEFVCKRGYRLSSRSHLRTTCWDGKLEY<br>PTCAKRENLYFQGHHHHHH |
