# Supplementary material for: Structure-Guided Engineering of a Complement Component C3-Binding Nanobody Improves Specificity and Adds Cofactor Activity
Source: PubMed Central journal article supplement (PMC9352930; doi:10.3389/fimmu.2022.872536), 2022-07-22
Supplement: Table_2.pdf [file Table_2.pdf]

**Table S2. Data collection and refinement statistics.** Statistics for the highest-resolution shell are shown in parentheses. The table was generated with phenix.table\_one.

| <b>Data collection</b>             |                     |
|------------------------------------|---------------------|
| Wavelength                         | 0.9763              |
| Resolution range                   | 48.31-2.8 (2.9-2.8) |
| Space group                        | P 21 21 2           |
| Unit cell                          | 255.31 64.88 144.72 |
| Total reflections                  | 816285 (83194)      |
| Unique reflections                 | 60284 (5282)        |
| Multiplicity                       | 13.5 (14.1)         |
| Completeness (%)                   | 98.61 (89.10)       |
| Mean I/sigma(I)                    | 11.74 (0.73)        |
| Wilson B-factor                    | 83.24               |
| R-sym                              | 0.2238 (2.725)      |
| CC <sub>1/2</sub>                  | 0.998 (0.495)       |
| <b>Refinement</b>                  |                     |
| Reflections used in refinement     | 59480 (5272)        |
| Reflections used for R-free        | 1471 (135)          |
| R-work                             | 0.2359 (0.3593)     |
| R-free                             | 0.2742 (0.4072)     |
| Number of non-hydrogen atoms       | 13155               |
| RMS(bonds)                         | 0.004               |
| RMS(angles)                        | 0.74                |
| Ramachandran favored (%)           | 96.62               |
| Ramachandran allowed (%)           | 3.32                |
| Ramachandran outliers (%)          | 0.06                |
| Rotamer outliers (%)               | 2.06                |
| Clashscore                         | 2.21                |
| Average B-factor (Å <sup>2</sup> ) | 111.13              |
